# Supplementary material for: Measuring the methylome in clinical samples: Improved processing of the Infinium Human Methylation450 BeadChip Array
Source: PubMed Central journal article supplement — Epigenetics. 2012 Oct 1;7(10):1173–87. doi: 10.4161/epi.22102 (PMC3469459; doi:10.4161/epi.22102), 2012-10-01
Supplement: epi-7-1173-s01.pdf [file epi-7-1173-s01.pdf]

**Supplemental Material to:**

Pan H, Chen L, Dogra S, The AL, Tan JH, Lim YI, et al. Measuring the methylome in clinical samples: Improved processing of the Infinium Human Methylation450 BeadChip Array. *Epigenetics* 2012; 7(10); <http://dx.doi.org/10.4161/epi.22102>  
<http://www.landesbioscience.com/journals/epigenetics/article/22102/>

**Supplementary table 1: Demographic characteristics of sample sets**

**Supplementary table 2: Schematic of experimental design**

**Supplementary table 3: Number of CpG % methylation values showing agreement within 5%, 10% and 20% ranges, between Infinium 450K and RRBS (Nreads  $\geq 4$ ) data, when Infinium data is subjected to individual steps processing, combined processing, GenomeStudio (GS) processing, GS and type II adjustment or SWAN. The greatest number of CpGs agreeing at every level, between processing methods are highlighted in yellow. Overall correlation statistics are also shown (n=454,660)**

**Supplementary table 4: Number of CpG % methylation values showing agreement within 5%, 10% and 20% ranges, between Infinium 450K and RRBS (Nreads  $\geq 10$ ) data, when Infinium data is subjected to individual steps processing, combined processing, GenomeStudio (GS) processing, GS and type II adjustment or SWAN. The greatest number of CpGs agreeing at every level, between processing methods are highlighted in yellow. Overall correlation statistics are also shown (n=387,789)**

**Supplementary table 5: Number of CpG % methylation values showing agreement or not (within 10%), between SWAN processed Infinium 450K and RRBS data (Nreads  $\geq 4$ ), at different % methylation value ranges.**

**Supplementary table 6: Number of probes associated with chip-batch and gender and gestational age phenotypes at ANOVA pvalue  $< 0.01$ , in raw data, processed data and SWAN processed data, n=426,831**

**Supplementary table 7: Number of probes associated with chip-batch and gender and gestational age phenotypes at ANOVA FDR corrected pvalue  $\leq 0.2$  in raw data, processed data SWAN processed data, n=426,831**

Supplemental Methods

```
#####  
#The R script for signal correction from red and green color channels in Infinium 450k  
#####  
#The signal file from GenomeStudio should contain AVG_Beta, Intensity and etc as the below items  
#for each sample.  
#####  
#TargetID
```

```
#6164655096_R05C02.AVG_Beta
#6164655096_R05C02.Intensity
#6164655096_R05C02.Avg_NBEADS_A
#6164655096_R05C02.Avg_NBEADS_B
#6164655096_R05C02.Signal_A
#6164655096_R05C02.Signal_B
#6164655096_R05C02.Detection Pval
#####
```

```
#####
#ControlProfile (one sample) from GenomeStudio
#####
```

```
#Index TargetID 6164655096_R05C02.Signal_Grn 6164655096_R05C02.Signal_Red
#1 BISULFITE CONVERSION I 5769.917 9938
#2 BISULFITE CONVERSION II 2299 37534
#3 EXTENSION 23293.5 33670.75
#4 HYBRIDIZATION 26142.67 1692.333
#5 NEGATIVE 161.2217 282.0367
#6 NON-POLYMORPHIC 9678.25 16405.5
#7 NORM_A 1005.938 11977.75
#8 NORM_C 8361.771 652.1312
#9 NORM_G 9988.906 944.7188
#10 NORM_T 464.8524 10485.23
#11 SPECIFICITY I 3786.667 7669.75
#12 SPECIFICITY II 580.3333 29149.33
#13 STAINING 9124.75 14790.5
#14 TARGET REMOVAL 519.5 1783.5
```

```
#####
#####Script Start
```

```
#####Input and output file name
signal_file <- "U7noncontrolnorm_complete.txt" #the signal files from GenomeStudio
color_ann_file <- "Illumina_450K_annotation_light.txt" #Illumina450K annotation file
profile_file <- "U7ControlProfile.txt" #the controlprofile
from GeomeStudio
output_file <- "beta_color.txt" #the result
file: color adjusted bata value
```

```
#####Read in signal
signal <- read.table(signal_file, sep="\t", head=TRUE)
ann <- read.table(color_ann_file, sep="\t", quote = "", head=TRUE)
signal <- merge(signal, ann[,c(1:3)], by.x="TargetID", by.y="TargetID")
```

```
#####InternalQC, removal of Detection pvalue>0.05 and
#####the number of BEADS <3.
pvalue_col <- c(grep("Detection.Pval", colnames(signal)))
x <- apply(signal[,pvalue_col] <= 0.05, 1, sum)
idx1 <- which(x == length(pvalue_col))
```

```
NBEADSA <- c(grep("NBEADS_A", colnames(signal)))
```

```

y <- apply(signal[,NBEADSA] >= 3, 1, sum)
idx2 <- which(y == length(NBEADSA))

NBEADSB <- c(grep("NBEADS_B", colnames(signal)))
z <- apply(signal[,NBEADSB] >= 3, 1, sum)
idx3 <- which(z == length(NBEADSB))

all_good <- intersect(intersect(idx1, idx2), idx3)

#####control profile
profile_data <- read.table(profile_file, sep="\t", head=TRUE)
grn_col <- c(grep("Signal_Grn", colnames(profile_data)))
red_col <- c(grep("Signal_Red", colnames(profile_data)))

control_grn <- as.matrix((profile_data[8, grn_col]+ profile_data[9, grn_col])/2)
# average (NORM_C+NORM_G)

control_red <- as.matrix((profile_data[7, red_col]+ profile_data[10, red_col])/2)
#average(NORM_A+NORM_T)

negative_grn <-as.matrix(profile_data[5, grn_col])
negative_red <-as.matrix(profile_data[5, red_col])

#####signal_A: red(unmethylated) and signal_B: green(methylated)
signalA_col<-grep("Signal_A", colnames(signal))
signalB_col<-grep("Signal_B", colnames(signal))

####typell
idx1 <- intersect(which(signal$INFINIUM_DESIGN_TYPE == "II"), all_good)
adjSA1 <- as.character(signal[idx1,1])
adjSB1 <- as.character(signal[idx1,1])
n <- length(signalA_col)

for (i in 1:n) {
  adjSA <- signal[idx1,signalA_col[i]] - negative_red[i]
  adjSB <- signal[idx1,signalB_col[i]] * (control_red[i]/control_grn[i]) -
negative_grn[i]*(control_red[i]/control_grn[i])
  adjSA[adjSA <= 0] <- 0.1
  adjSB[adjSB <= 0] <- 0.1

  adjSA1 <- data.frame(adjSA1, adjSA)
  adjSB1 <- data.frame(adjSB1, adjSB)
}

#type1_red
rm(idx1, adjSA, adjSB)
idx1 <- intersect(which(signal$INFINIUM_DESIGN_TYPE == "I"), which(signal$COLOR_CHANNEL=="Red"))
idx1 <- intersect(idx1, all_good)
adjSA2 <- as.character(signal[idx1,1])

```

```

adjSB2 <- as.character(signal[idx1,1])

for (i in 1:n) {
  adjSA <- signal[idx1,signalA_col[i]] - negative_red[i]
  adjSB <- signal[idx1,signalB_col[i]] - negative_red[i]
  adjSA[adjSA <= 0] <- 0.1
  adjSB[adjSB <= 0] <- 0.1

  adjSA2 <- data.frame(adjSA2, adjSA)
  adjSB2 <- data.frame(adjSB2, adjSB)
}

#idx_type1_grn
rm(idx1, adjSA, adjSB)
idx1 <- intersect(which(signal$INFINIUM_DESIGN_TYPE == "I"), which(signal$COLOR_CHANNEL=="Grn"))
idx1 <- intersect(idx1, all_good)
adjSA3 <- as.character(signal[idx1,1])
adjSB3 <- as.character(signal[idx1,1])

for (i in 1:n) {
  adjSA <- signal[idx1,signalA_col[i]] * (control_red[i]/control_grn[i]) -
negative_grn[i]*(control_red[i]/control_grn[i])
  adjSB <- signal[idx1,signalB_col[i]] * (control_red[i]/control_grn[i]) -
negative_grn[i]*(control_red[i]/control_grn[i])
  adjSA[adjSA <= 0] <- 0.1
  adjSB[adjSB <= 0] <- 0.1

  adjSA3 <- data.frame(adjSA3, adjSA)
  adjSB3 <- data.frame(adjSB3, adjSB)
}

colnames(adjSA1)[1] <- "ProbeID"
colnames(adjSA2)[1] <- "ProbeID"
colnames(adjSA3)[1] <- "ProbeID"
adjSA<- rbind(adjSA1,adjSA2,adjSA3)

colnames(adjSB1)[1] <- "ProbeID"
colnames(adjSB2)[1] <- "ProbeID"
colnames(adjSB3)[1] <- "ProbeID"
adjSB<- rbind(adjSB1,adjSB2,adjSB3)

adjSB_order <- adjSB[order(adjSB[,1]),]
adjSA_order <- adjSA[order(adjSA[,1]),]

beta <- as.character(adjSB_order[,1])

for (i in 2:(n+1)) {
  tmp_beta <- adjSB_order[i]/(adjSB_order[i] + adjSA_order[i] + 100)
  beta <- data.frame(beta, tmp_beta)
}

```

```
}
```

```
colnames(beta) <- c("TargetID", gsub(".Signal_A", ".AVG_Beta", colnames(signal)[signalA_col]))
```

```
colnames(beta) <- gsub("X", "", colnames(beta))
```

```
write.table(beta, output_file, row.names = F, quote = F, sep = "\t")
```

```
#end of script.
```

```
#####
#R script for typell correction.
#####
datafile <- "beta_color.txt" #beta file
typefile <- "Illumina_450K_annotation_light.txt"#Infinium450k annotation file
outputfile1 <- "beta_color_typell.txt" #output file.

#read data file
data1 <- read.table(datafile, sep="\t", header=TRUE)
type1 <- read.table(typefile, sep="\t", quote="", header=TRUE)
name_x <- as.character(colnames(data1)[1])
name_y <- as.character(colnames(type1)[1])
data1 <- merge(data1, type1[,c(1:2)], by.x=name_x, by.y=name_y)
head(data1); dim(data1)

naidx <- apply(is.na(data1), 1, sum)
data1 <- data1[which(naidx == 0),]

row_size <- dim(data1)[1]
col_size <- dim(data1)[2] - 1

idx1 <- which(data1$INFINIUM_DESIGN_TYPE=='I' )
idx2 <- which(data1$INFINIUM_DESIGN_TYPE=='II')

beta1_typed_probe <- as.character(data1[idx1,1])
beta1_typed_probe <- as.character(data1[idx2,1])
len <- length(colnames(data1))

beta1_corrected <- c(as.character(beta1_typed_probe), as.character(beta1_typed_probe))
for (i in 2:col_size){
beta1 <- data1[,i] #one sample
cat(colnames(data1)[i], "; ")
beta_typed <- beta1[idx1]
beta_typed <- beta1[idx2]

m1 <- log2(beta_typed/(1 - beta_typed))
m2 <- log2(beta_typed/(1 - beta_typed))
probe_typed <- length(m2)

#plot the density of typed and typed beta value.
#dev.new(1)
#par(mfrow=c(2,2))
#plot(density(beta_typed, bw=0.05), main='Fig1: Beta value for typed and typed(red)')
#lines(density(beta_typed, bw=0.05), col='red')
#plot(density(m2, bw=0.5, kernel="gaussian", n=200, na.rm=TRUE), col='red', main='Fig2: M value for typed
and typed(red)')
#lines(density(m1, bw=0.5, kernel="gaussian", n=200, na.rm=TRUE))

```

```

#typel M-value as the base.
dm1 <- density(m1, bw=0.5, kernel="gaussian", n=200, na.rm=TRUE)
sigma_m1 <- dm1$x[which.max(dm1$y[dm1$x >= 0])+ length(dm1$x[dm1$x < 0])]
sigma_u1 <- dm1$x[which.max(dm1$y[dm1$x < 0])]
cat(sigma_m1, "; ", sigma_u1, "\n")

#####adjust typell M value according to typel
dm2 <- density(m2, bw=0.5, kernel="gaussian", n=200, na.rm=TRUE)
sigma_m2 <- dm2$x[which.max(dm2$y[dm2$x >= 0])+ length(dm2$x[dm2$x < 0])]
sigma_u2 <- dm2$x[which.max(dm2$y[dm2$x < 0])]
cat(sigma_m2, "; ", sigma_u2, "\n")
mm2 <- rep(0, probe_typell)
idx11 <- which(m2 >= 0)
idx22 <- which(m2 < 0)
mm2[idx11]<- (m2[idx11]/sigma_m2)*sigma_m1
mm2[idx22]<- (m2[idx22]/sigma_u2)*sigma_u1
beta_typell_corrected <- 2^mm2/(2^mm2+1)

#plot(density(mm2,bw=0.5, kernel="gaussian", n=200, na.rm=TRUE), col='red', main="Fig3. M value in typel
and adjust typell(red)")
#lines(density(m1, bw=0.5, kernel="gaussian", n=200, na.rm=TRUE))
#plot(density(beta_typel, bw=0.05), main='Fig4: Beta value in typel and corrected typell(red)')
#lines(density(beta_typell_corrected, bw=0.05), col='red')

temp <- c(beta_typel, beta_typell_corrected)
beta1_corrected <- data.frame(beta1_corrected, temp)
}
colnames(beta1_corrected) <- as.character(colnames(data1)[1:col_size])
colnames(beta1_corrected) <- gsub("X", "", colnames(beta1_corrected))
write.table(beta1_corrected, outputfile1, sep='\t', quote = F, row.names=FALSE)

#end of script.

```



**Supplementary table 1: Demographic characteristics of sample sets**

| <b>SampleSet</b>            | <b>Expanded 72</b>            | <b>7 compared to RRBS</b> |
|-----------------------------|-------------------------------|---------------------------|
| <b>Gender</b>               | 32 female, 40 male            | 7 male                    |
| <b>Median BW (g)</b>        | 3038.50                       | 3352.00                   |
| <b>Mean BW (+/- sd) (g)</b> | 3070.88(+/- 576.40)           | 3325.72(+/- 329.33)       |
| <b>Median GA (w)</b>        | 39.00                         | 39.43                     |
| <b>Mean GA (+/- sd) (w)</b> | 38.46(+/-1.71)                | 38.88 (+/- 1.20)          |
| <b>Ethnic Group</b>         | Chinese 65, Indian 2, Malay 5 | Chinese 7                 |

Supplementary table 2

| Sample                   | 1    |               | 2    |               | 3    |               | 4    |               | 5    |               | 6    |               | 7    |               |
|--------------------------|------|---------------|------|---------------|------|---------------|------|---------------|------|---------------|------|---------------|------|---------------|
| Technology               | RRBS | Infinium 450K |
| Cord                     |      |               |      |               |      |               |      |               |      |               |      |               |      |               |
| DNA extraction           |      |               |      |               |      |               |      |               |      |               |      |               |      |               |
| bisulphite conversion    |      |               |      |               |      |               |      |               |      |               |      |               |      |               |
| Infinium 450K experiment | 1    |               | 2    |               | 2    |               | 2    |               | 3    |               | 3    |               | 3    |               |
| Infinium 450K array      | 1A   |               | 2A   |               | 2B   |               | 2A   |               | 3A   |               | 3A   |               | 3B   |               |

Supplementary table 3

Number of CpG % methylation values showing agreement within 5%, 10% and 20% ranges, between Infinium 450K and RRBS (Nreads ≥4) data, when Infinium data is subjected to individual steps processing, combined processing, GenomeStudio (GS) processing, GS and type II adjustment or SWAN. The greatest number of CpGs agreeing at every level, between processing methods are highlighted in yellow. Overall correlation statistics are also shown (n=454,660)

| Difference Range (n=454,660)    | within 20% |         | within 10% |         | within 5% |         | Spearman's Rank R | Pearson's R <sup>2</sup> | Slope |
|---------------------------------|------------|---------|------------|---------|-----------|---------|-------------------|--------------------------|-------|
|                                 | Type I     | Type II | Type I     | Type II | Type I    | Type II |                   |                          |       |
| <b>Probe Type</b>               | Type I     | Type II | Type I     | Type II | Type I    | Type II | 0.83              | 0.92                     | 0.83  |
| <b>Raw Data</b>                 | 196,937    | 217,721 | 172,003    | 161,520 | 132,267   | 75,144  | p<0.001           | p<0.001                  |       |
|                                 | 93%        | 90%     | 81%        | 67%     | 62%       | 31%     |                   |                          |       |
| <b>Raw + colour adjustment</b>  | 197,089    | 221,887 | 173,872    | 165,158 | 139,888   | 73,510  | 0.83              | 0.92                     | 0.87  |
|                                 | 93%        | 92%     | 82%        | 68%     | 66%       | 30%     | p<0.001           | p<0.001                  |       |
| <b>Raw + Type II adjustment</b> | 196,937    | 225,922 | 172,003    | 193,550 | 132,267   | 144,968 | 0.83              | 0.93                     | 0.9   |
|                                 | 93%        | 93%     | 81%        | 80%     | 62%       | 60%     | p<0.001           | p<0.001                  |       |
| <b>Raw + QN</b>                 | 196,514    | 221,171 | 172,154    | 165,537 | 132,776   | 77,541  | 0.83              | 0.92                     | 0.85  |
|                                 | 92%        | 91%     | 81%        | 68%     | 62%       | 32%     | p<0.001           | p<0.001                  |       |
| <b>Combined processing</b>      | 197,444    | 226,386 | 175,211    | 195,114 | 143,022   | 149,216 | 0.83              | 0.93                     | 0.93  |
|                                 | 93%        | 94%     | 82%        | 81%     | 67%       | 62%     | p<0.001           | p<0.001                  |       |
| <b>Raw + GS</b>                 | 197,000    | 221,523 | 173,078    | 161,101 | 136,568   | 65,024  | 0.83              | 0.92                     | 0.86  |
|                                 | 93%        | 92%     | 81%        | 67%     | 64%       | 27%     | p<0.001           | p<0.001                  |       |
| <b>GS + Type II</b>             | 197,000    | 225,810 | 173,078    | 191,340 | 136,568   | 141,469 | 0.83              | 0.94                     | 0.92  |
|                                 | 93%        | 93%     | 81%        | 79%     | 64%       | 58%     | p<0.001           | p<0.001                  |       |
| <b>Raw + SWAN</b>               | 198,347    | 224,342 | 172,472    | 177,745 | 127,145   | 92,454  | 0.83              | 0.93                     | 0.87  |
|                                 | 93%        | 93%     | 81%        | 73%     | 60%       | 38%     | p<0.001           | p<0.001                  |       |

Supplementary table 4

Number of CpG % methylation values showing agreement within 5%, 10% and 20% ranges, between Infinium 450K and RRBS (Nreads ≥10) data, when Infinium data is subjected to individual steps processing, combined processing, GenomeStudio (GS) processing, GS and type II adjustment or SWAN. The greatest number of CpGs agreeing at every level, between processing methods are highlighted in yellow. Overall correlation statistics are also shown (n=387,789)

| Difference Range (n=387,789)    | within 20% |         | within 10% |         | within 5% |         | Spearman's Rank R | Pearson's R <sup>2</sup> | Slope |
|---------------------------------|------------|---------|------------|---------|-----------|---------|-------------------|--------------------------|-------|
|                                 | Type I     | Type II | Type I     | Type II | Type I    | Type II |                   |                          |       |
| <b>Raw Data</b>                 | 166,565    | 192,635 | 147,047    | 145,040 | 114,131   | 69,159  | 0.83              | 0.93                     | 0.84  |
|                                 | 94%        | 92%     | 83%        | 69%     | 64%       | 33%     | p<0.001           | p<0.001                  |       |
| <b>Raw + colour adjustment</b>  | 166,723    | 195,934 | 148,589    | 148,186 | 119,916   | 67,879  | 0.83              | 0.93                     | 0.88  |
|                                 | 94%        | 93%     | 84%        | 71%     | 67%       | 32%     | p<0.001           | p<0.001                  |       |
| <b>Raw + Type II adjustment</b> | 166,565    | 199,467 | 147,047    | 173,432 | 114,131   | 131,670 | 0.83              | 0.94                     | 0.91  |
|                                 | 94%        | 95%     | 83%        | 83%     | 64%       | 63%     | p<0.001           | p<0.001                  |       |
| <b>Raw + QN</b>                 | 166,113    | 195,750 | 147,106    | 148,832 | 114,507   | 71,431  | 0.83              | 0.93                     | 0.86  |
|                                 | 93%        | 93%     | 83%        | 71%     | 64%       | 34%     | p<0.001           | p<0.001                  |       |
| <b>Combined processing</b>      | 167,026    | 199,786 | 149,690    | 174,764 | 122,500   | 135,190 | 0.83              | 0.94                     | 0.95  |
|                                 | 94%        | 95%     | 84%        | 83%     | 69%       | 64%     | p<0.001           | p<0.001                  |       |
| <b>Raw + GS</b>                 | 166,629    | 195,614 | 147,931    | 144,716 | 117,450   | 60,266  | 0.83              | 0.93                     | 0.87  |
|                                 | 94%        | 93%     | 83%        | 69%     | 66%       | 29%     | p<0.001           | p<0.001                  |       |
| <b>GS + Type II</b>             | 166,629    | 199,306 | 147,931    | 171,494 | 117,450   | 128,378 | 0.83              | 0.94                     | 0.92  |
|                                 | 94%        | 95%     | 83%        | 82%     | 66%       | 61%     | p<0.001           | p<0.001                  |       |
| <b>Raw + SWAN</b>               | 167,878    | 197,973 | 147,670    | 159,599 | 110,506   | 85,521  | 0.83              | 0.94                     | 0.88  |
|                                 | 94%        | 94%     | 83%        | 76%     | 62%       | 41%     | p<0.001           | p<0.001                  |       |

**Supplementary table 5**

**Number of CpG % methylation values showing agreement or not (within 10%), between SWAN processed Infinium 450K and RRBS data (Nreads  $\geq 4$ ), at different % methylation value ranges.**

| <b>Infinium<br/><math>\beta</math> Value Range</b> | <b>Difference<br/>&lt; 10%</b> | <b>Difference<br/>&gt;10%</b> | <b>Total</b> | <b>Median<br/>Absolute<br/>Difference</b> | <b>Standard<br/>Deviation of<br/>Absolute<br/>Difference</b> |
|----------------------------------------------------|--------------------------------|-------------------------------|--------------|-------------------------------------------|--------------------------------------------------------------|
| <b><math>x \leq 20\%</math></b>                    | 242,195                        | 23,823                        | 266,018      | 4.11                                      | 3.89                                                         |
|                                                    | 91%                            | 9%                            |              |                                           |                                                              |
| <b><math>20\% &lt; x \leq 80\%</math></b>          | 35,284                         | 58,032                        | 93,316       | 13.31                                     | 11.76                                                        |
|                                                    | 38%                            | 62%                           |              |                                           |                                                              |
| <b><math>80\% &lt; x \leq 100\%</math></b>         | 72,738                         | 22,588                        | 95,326       | 5.99                                      | 8.28                                                         |
|                                                    | 76%                            | 24%                           |              |                                           |                                                              |

Supplementary table 6

Number of probes associated with chip-batch and gender and gestational age phenotypes at ANOVA pvalue <0.01, in raw data, processed data SWAN processed data, n=426,831

|                     | ChipBatch        | Gender          | Gestational Age |
|---------------------|------------------|-----------------|-----------------|
| Raw                 | 163,438 (38.29%) | 29,642 (6.94%)  | 3,842 (0.90%)   |
| Combined processing | 58,532(13.71%)   | 48,436 (11.35%) | 8,454 (1.98%)   |
| SWAN                | 83,139 (19.48%)  | 26,061 (6.11%)  | 7,766 (1.82%)   |

---

**Supplementary table 7**

**Number of probes associated with chip-batch and gender and gestational age phenotypes at ANOVA FDR corrected pvalue  $\leq 0.2$  in raw data, processed data SWAN processed data, n=426,831**

|                            | <b>ChipBatch</b> | <b>Gender</b>   | <b>Gestational Age</b> |
|----------------------------|------------------|-----------------|------------------------|
| <b>Raw</b>                 | 233,650 (54.74%) | 41,108 (9.63%)  | 104 (0.02%)            |
| <b>Combined processing</b> | 123,611 (28.96%) | 73,595 (17.24%) | 179 (0.04%)            |
| <b>SWAN</b>                | 182,161(42.68%)  | 30, 684(7.19%)  | 41(<0.01%)             |

---
